# Supplementary material
Source: PubMed Central journal article supplement (PMC9382898)
Supplement: develop-149-200533-s1.pdf [file develop-149-200533-s1.pdf]

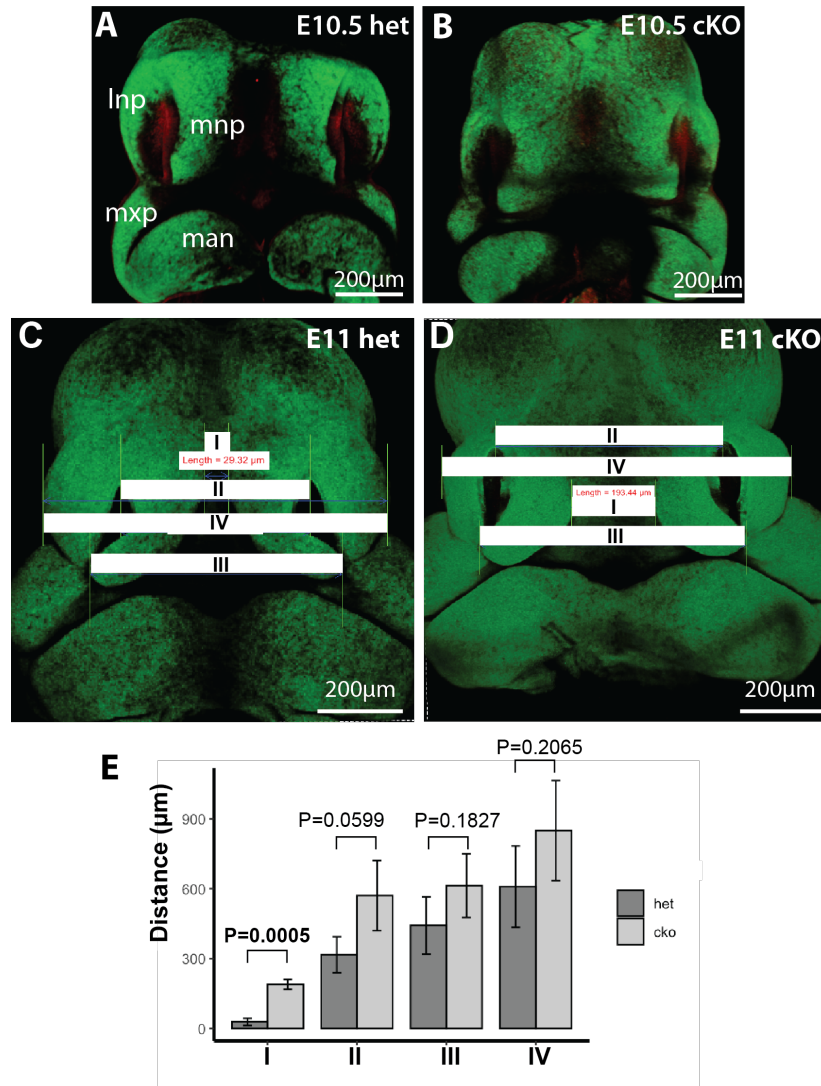

**Fig. S1. Genetic fate mapping and midline gap quantification of *Pax3<sup>Cre</sup>;Wls<sup>lox</sup>* midfacial primordia.** (A,B) Front facial views of genetic fate mapping of the heterozygous and cKO embryos at E10.5. (C,D) Measurements and comparisons of facial distances of (I) the midline gap between MNPs, (II) between dorsal nasal tips, (III) between bilateral junction zones, and (IV) between the lateral edges of LNPs in the cKOs (n = 3) and littermate heterozygous controls (n = 3) at E11.0-E11.25. (E) Only the midline gap (I) is significantly increased in the cKOs (P = 0.0005, t-test). Other distances (II-IV) are also slightly increased in cKOs without statistical significance (P > 0.05).

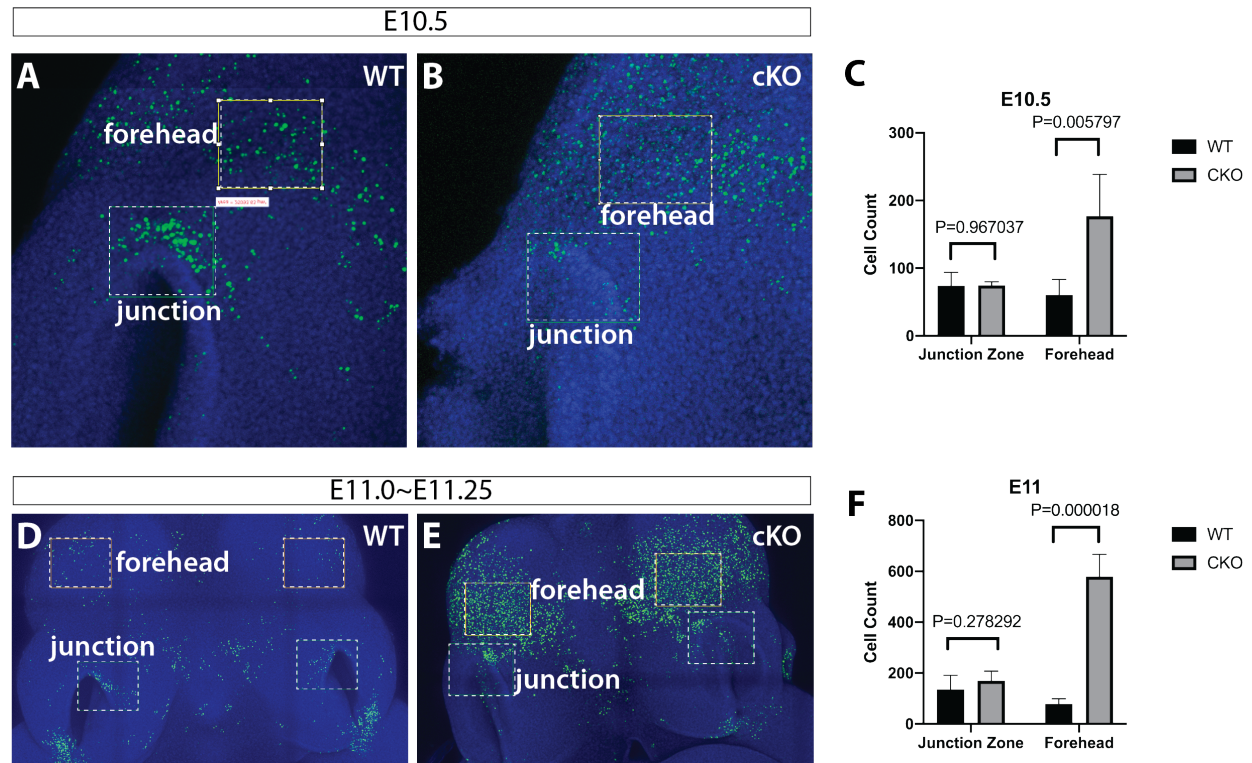

**Fig. S2. Quantifications of apoptotic cells in the dorsal nasal primordial junction zones and forehead regions of the littermate control and Pax3Cre;Wis-cKO embryos during midfacial development.** (A,B) TUNEL positive cells were automatically counted by ImageJ in the equally dashed-line squared areas covering the dorsal nasal primordial junction zones and forehead regions in the littermate control and cKO embryos at E10.5 (only right facial primordia were shown). (C) Bar graphs show no significant changes of TUNLE positive cells around the junction zones ( $P > 0.05$ ), and they are increased 2.93 folds in the forehead regions ( $P < 0.01$ ) of the cKOs ( $n = 4$  in 2 cKOs) compared with the littermate wild-type (WT) controls ( $n = 6$  in 3 embryos) at E10.5 (unpaired two-tailed Student's t-test). (D,E). TUNEL positive cells were counted in the equally dashed-line squared areas at E11.5. (F) Bar graphs show no significant changes of TUNLE positive cells around the junction zones ( $P > 0.05$ ), and they are increased 7.42 folds in the forehead regions ( $P = 0.000018$ ) of the cKOs ( $n = 6$  in 3 mutants) compared with the littermate wild-type (WT) controls ( $n = 6$  in 3 WT embryos) at E11.5 (two-tailed unpaired Student's t-test).  $P < 0.05$  is considered statistically significant.

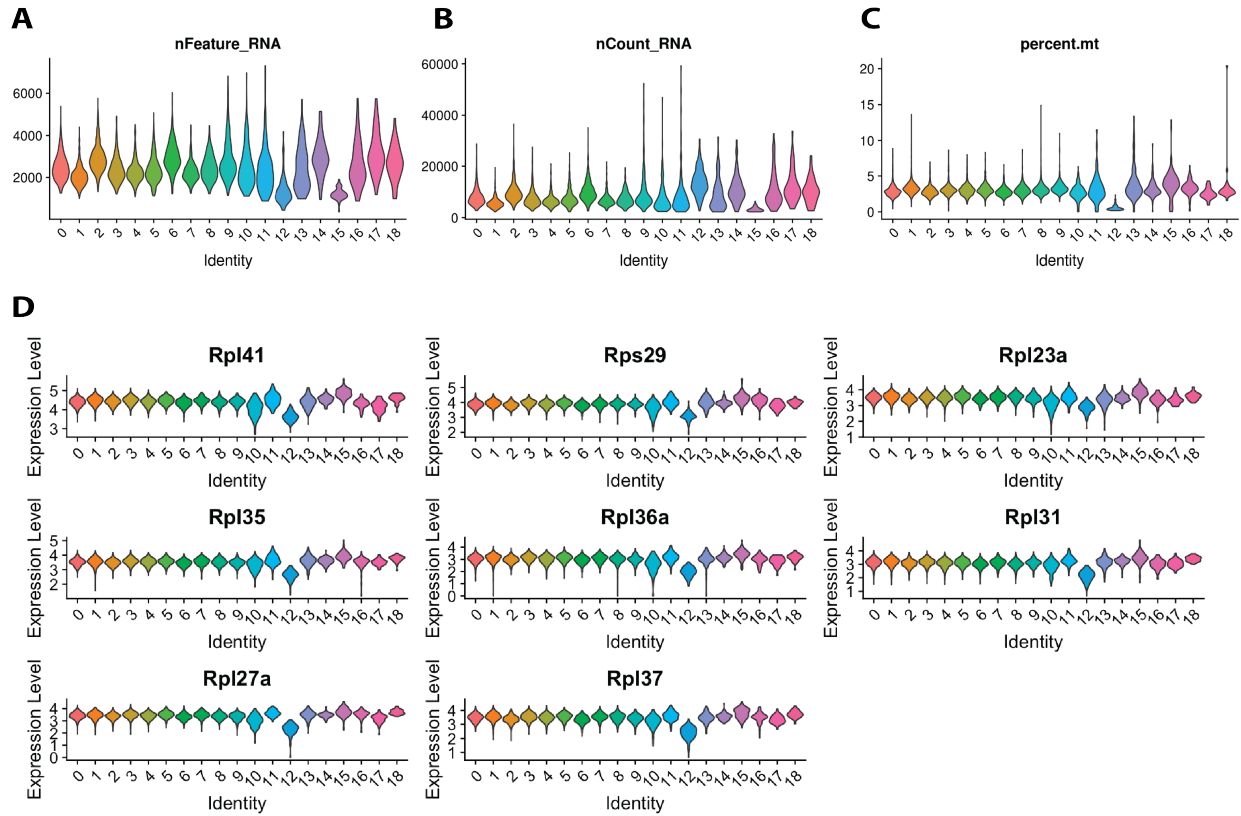

**Fig. S3. Quality control (QC) for scRNA-seq data.** (A-C) Violin plots show three quality control metrics, including the number of genes (`nFeature_RNA`) (A), number of unique molecular identifiers (UMIs or `nCount_RNA`) (B), and percentage of mitochondrial genes (`percent.mt`) (C) in individual clusters. (D) Violin plots of ribosomal genes in each cluster.

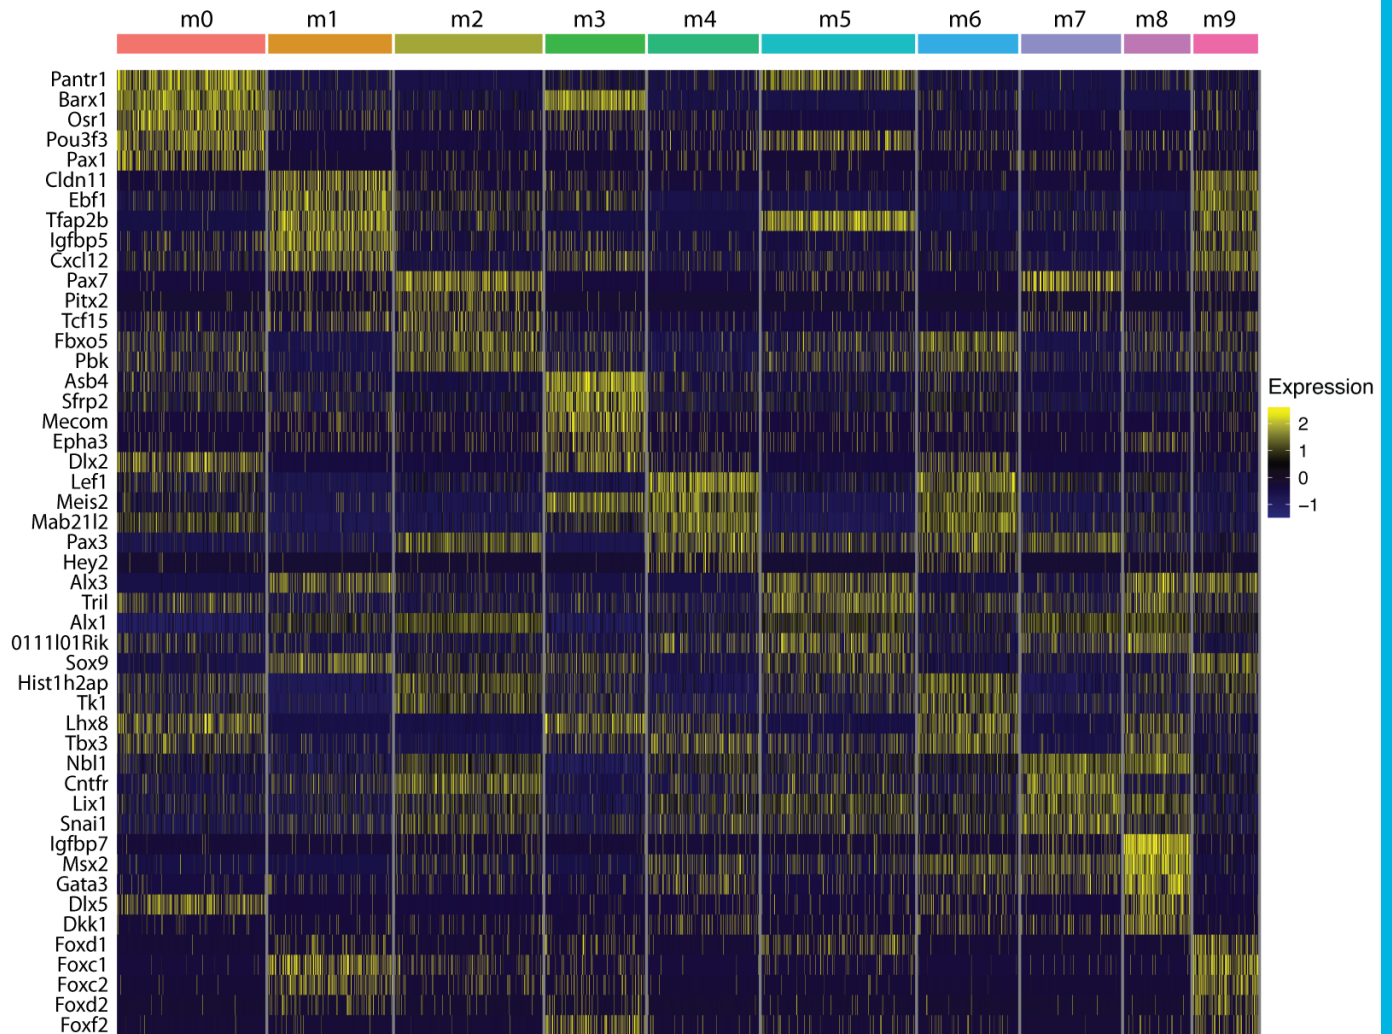

**Fig. S4. Top five gene markers for each mesenchymal subpopulation.** Heatmap shows expression of top five marker genes for 10 mesenchymal subpopulations labeled m0~m9 determined in E11.5 midfacial primordia.

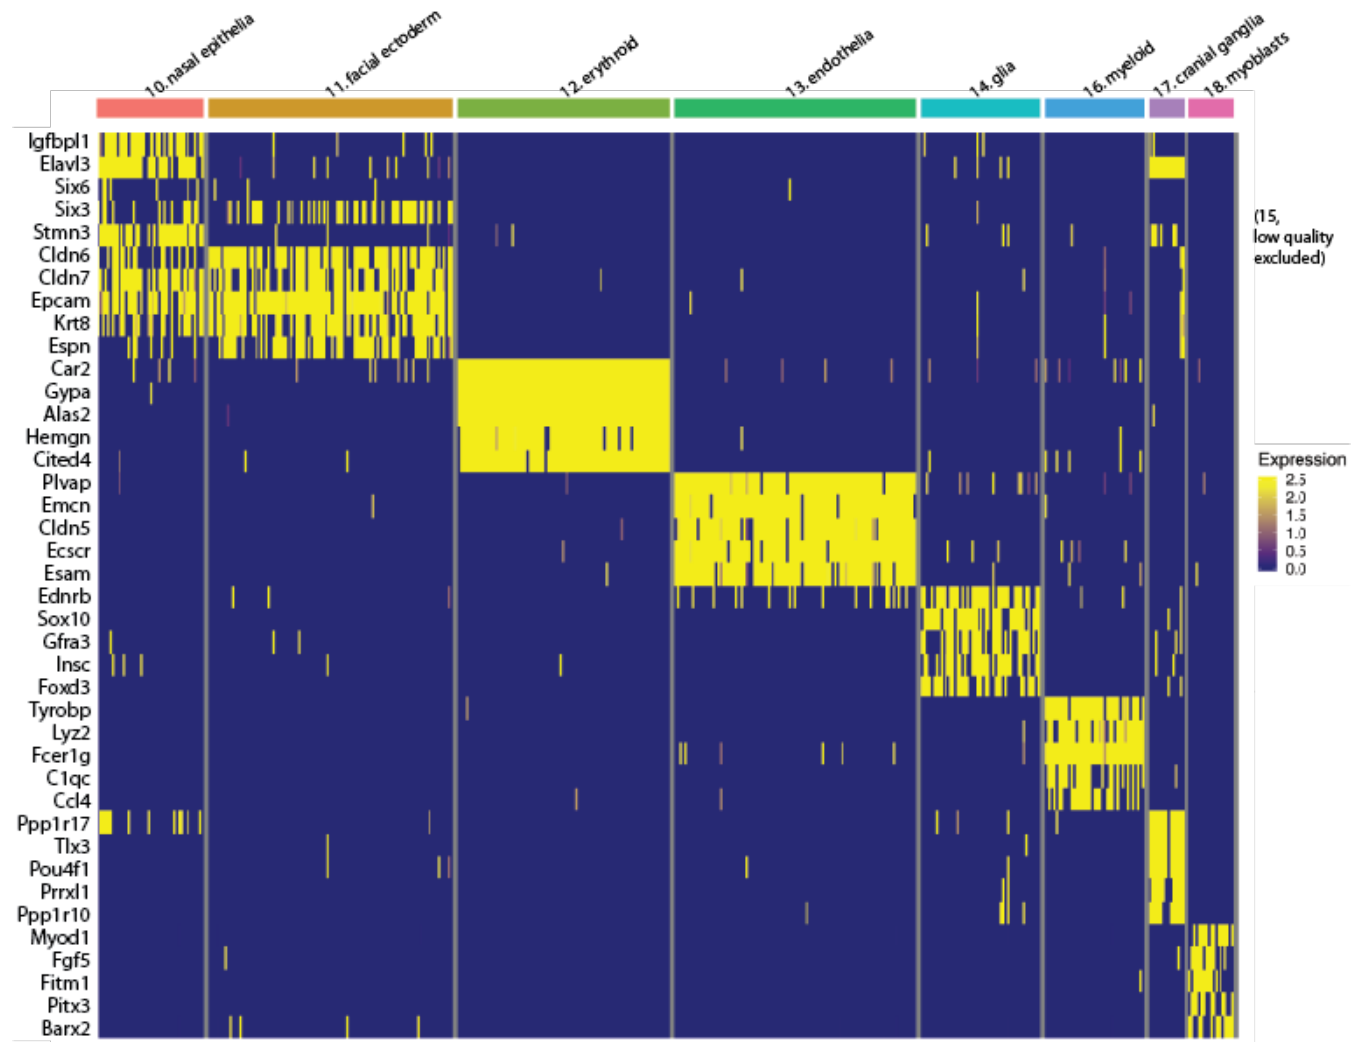

**Fig. S5. Gene markers for non-mesenchymal cells.** Heatmap shows expression of top five marker genes for 8 non-mesenchymal lineage cells of E11.5 midfacial primordia.

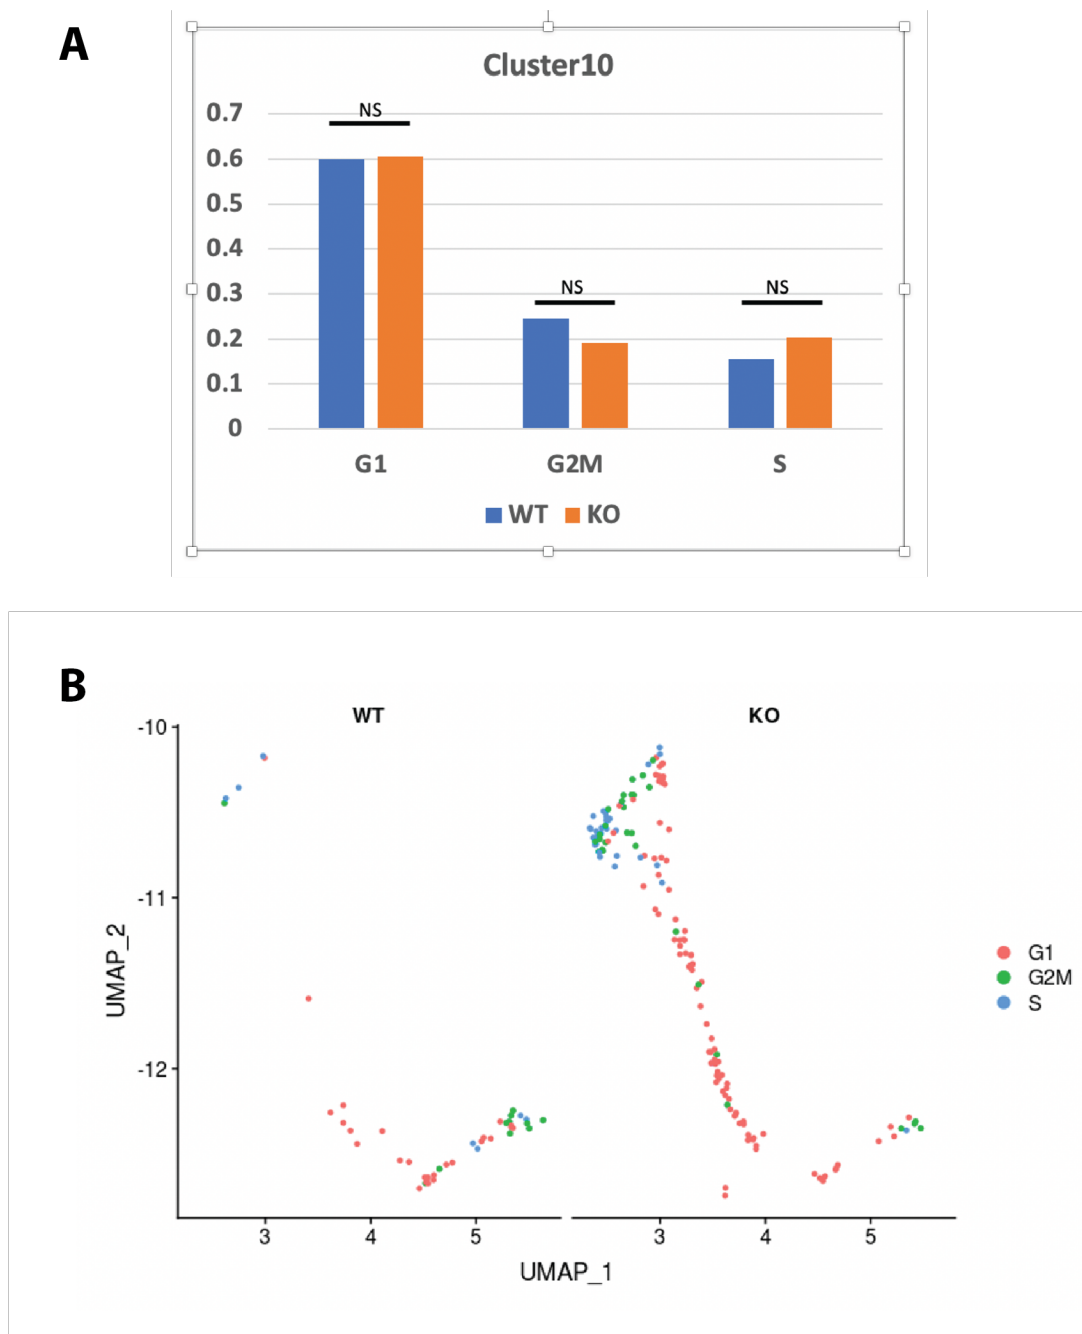

**Fig. S6. Cell cycle analyses of cluster 10 (nasal epithelial cells).** (A) Bar graphs show no significant (NS; Z-test) changes of G1, G2/M, and S phases of cluster 10 cells in Wls-cKOs. (B) UMAP shows significantly lower cell numbers in the wild-type (WT) control embryos compared to the cKO embryos, which is caused by a technical limitation of scRNA-seq preparation when individual cells were incorporated to liquid droplets from the WT midfacial primordia that contain much higher percentiles of mesenchymal cells than that in the cKO embryos, which reduces the chance of the much lower percentile of the WT nasal epithelial cells to be sequenced.

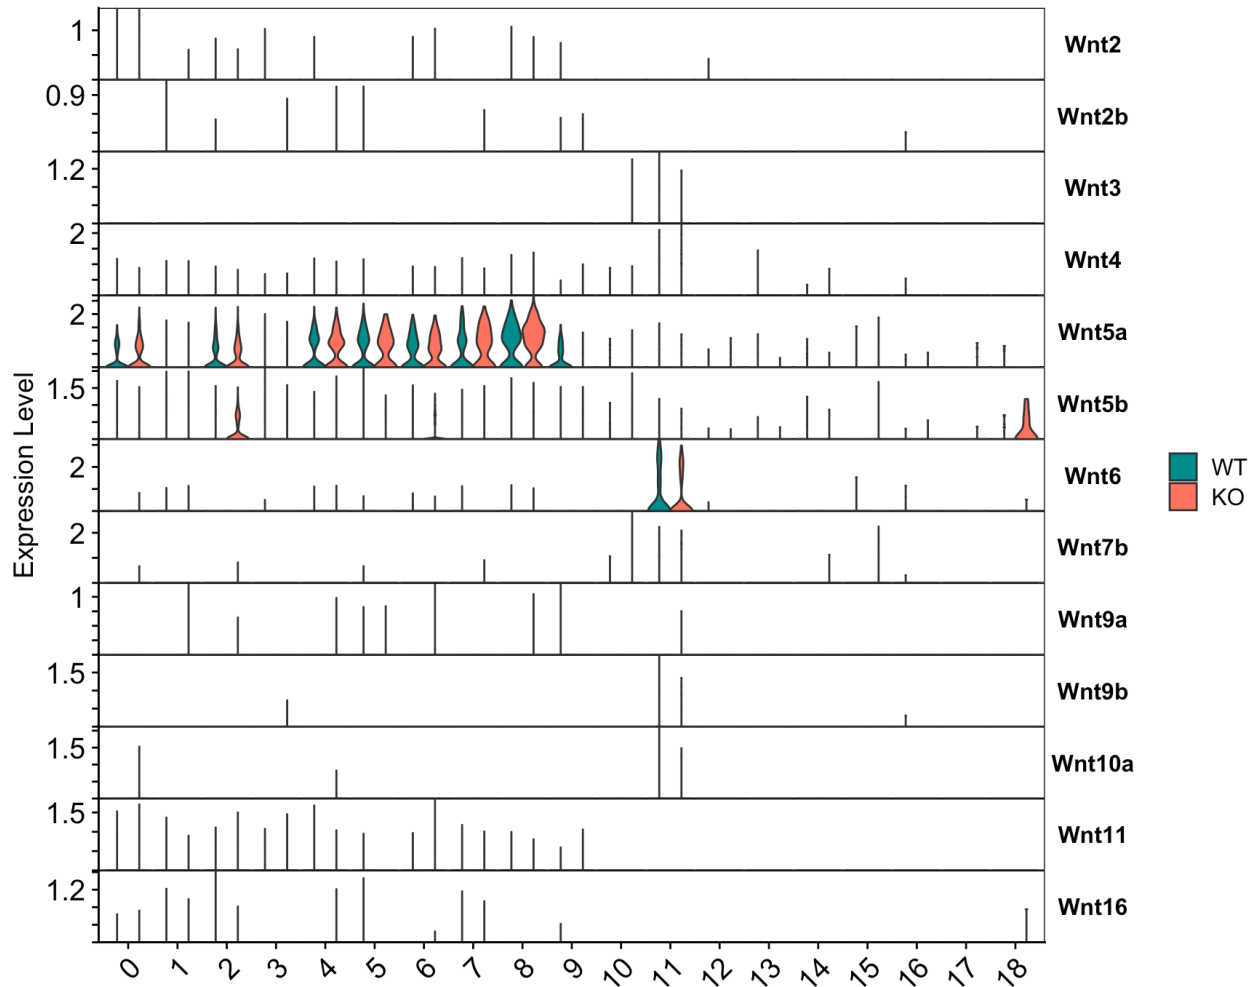

**Fig. S7. Violin plots of 13 *Wnts* in various cell types of midfacial primordia at E11.5.** *Wnt5a* is predominately expressed in midfacial mesenchymal cells (clusters 0-9) and *Wnt6* is mainly expressed in the surface ectodermal cells (cluster 11). The rest of 6 *Wnts* are not expressed.

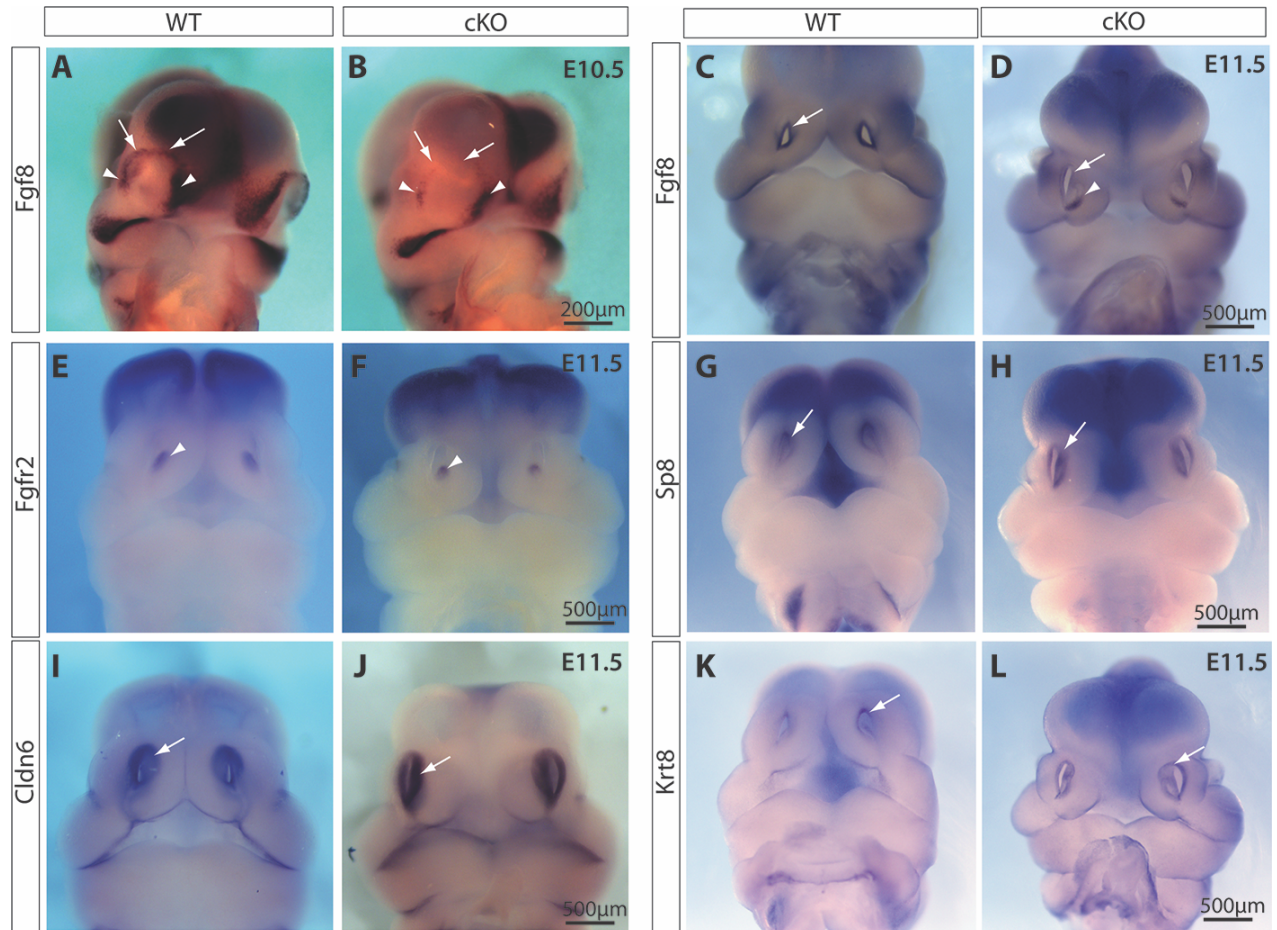

**Fig. S8. Non-neural nasal epithelial and surface ectodermal cell markers in WT and *Wls*-cKO midfacial primordia.** (A-D) Altered *Fgf8* expression patterns in the distal nasal epithelia of *Wls*-cKOs at E10.5 and E11.5. Arrows indicate the diminished and arrowheads indicate the conserved expression domains of *Fgf8* in the cKOs. (E,F) *Fgfr2* expression (arrowheads) is not altered in the nasal epithelia adjacent to mutant MNPs. (G,H) *Sp8* expression is not altered in the mutant nasal pit. (I,J) *Cldn6* expression is relatively conserved in the mutant nasal epithelia and surface ectoderm. (K,L) *Krt8* expression is relatively conserved in the mutant.



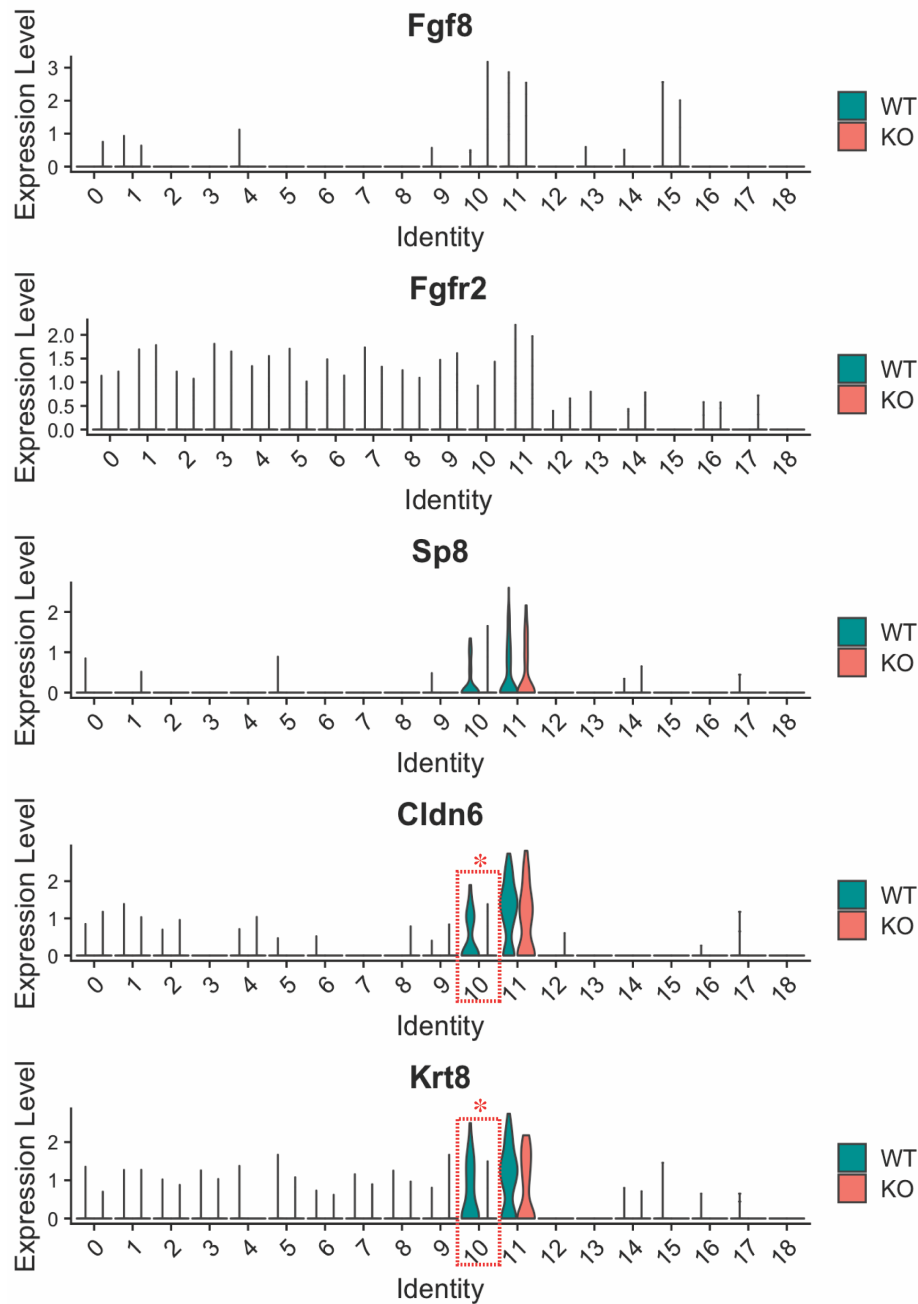

**Fig. S9. Violin plots of *Fgf8* and related non-neural epithelial genes in WT and *Wls*-cKO midfacial primordia at E11.5.** *Fgf8* is mainly expressed clusters 10, 11, and 15, but it is not determined as a DEG by scRNA-seq analysis. *Fgfr2* is widely detected in both mesenchymal and epithelial cells. *Sp8* is detected predominately in epithelial clusters 10 and 11. *Cldn6* and *Krt8* are high in 10 and 11, and both diminished in cluster 10. \*,  $P_{\text{adjust value}} < 0.05$ , bimod test.

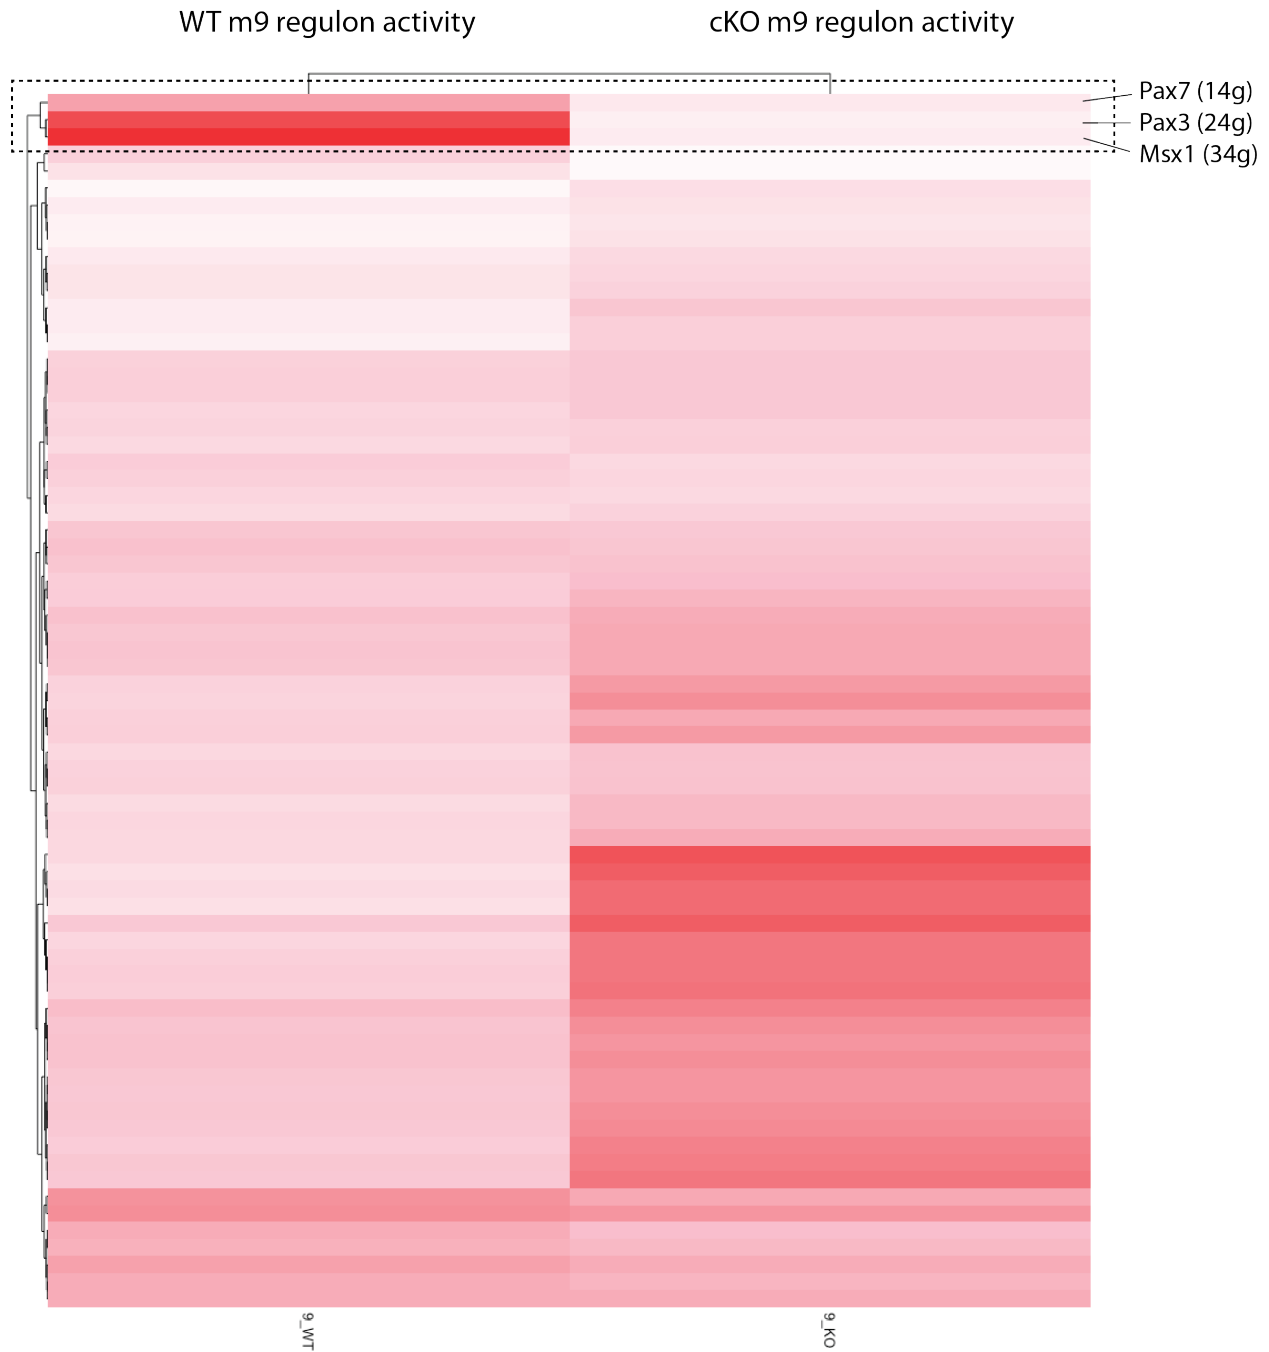

**Fig. S10. Heatmap of regulon activities in WT and *Wls*-deficient m9 mesenchymal cells.** A subcluster (dashed square) with high regulon activities consists of *Msx1*, *Pax3*, and *Pax7* in the WT, but they show little activities in the mutant. The number of predicted target genes is labeled after each regulon. For instance, *Msx1* (34g) means that *Msx1* regulates 34 target genes (see details in Fig. 11B).

**Table S1. Sequencing information.**

| <b>Samples (E11.5 mouse midfacial primordia)</b> | <b>Littermate control</b> | <b><i>Pax3<sup>Cre</sup>;Wls-cKO</i></b> |
|--------------------------------------------------|---------------------------|------------------------------------------|
| Estimated Number of Cells                        | 4,284                     | 3,441                                    |
| Mean Reads per Cell                              | 37,778                    | 63,081                                   |
| Median Genes per Cell                            | 2,241                     | 2,489                                    |
| Number of Reads                                  | 161,841,670               | 217,063,706                              |
| Sequencing Saturation                            | 65.80%                    | 78.40%                                   |
| Reads Mapped to Genome                           | 91.50%                    | 92.50%                                   |
| Reads Mapped Confidently to Intronic Regions     | 15.10%                    | 15.80%                                   |
| Reads Mapped Confidently to Exonic Regions       | 70.20%                    | 70.60%                                   |
| Total Genes Detected                             | 17,903                    | 17,981                                   |
| Median UMI Counts per Cell                       | 6,685                     | 7,475                                    |

**Table S2. Gene ontology relevant to midfacial development.** m0~m9, mesenchymal clusters 0~9; ne, nasal epithelia (cluster 10); se, surface ectoderm (cluster 11). \*, The bottom two rows are not specifically relevant to midfacial development.

|                                     | m0   | m1                      | m2          | m3               | m4          | m5                                                             | m6                          | m7           | m8                             | m9                                                                 | ne                                                               | se     |
|-------------------------------------|------|-------------------------|-------------|------------------|-------------|----------------------------------------------------------------|-----------------------------|--------------|--------------------------------|--------------------------------------------------------------------|------------------------------------------------------------------|--------|
|                                     | down | down                    | down        | up               | down        | up                                                             | down                        | down         | up                             | down                                                               | down                                                             | up     |
| face development                    |      |                         |             |                  |             | Pax9, Dlx5, Zfand5                                             |                             |              |                                | Msx1, Cdk2ap1, Wnt5a                                               | Grig8, Dlx5, Six1, Smchd1                                        |        |
| nose development                    |      |                         |             |                  |             | Six1, Dlx5                                                     |                             |              |                                |                                                                    |                                                                  |        |
| roof of mouth development           |      |                         |             |                  |             | Inhba, Foxf2, Dlx5, Osr2, Satb2, Tbx3, Alx1                    |                             |              |                                | Alx1, Prrx1, Msx1, Sox11, Tbx2, Anp32b, Acvr2b, Wnt5a, Gas1        |                                                                  |        |
| cell fate commitment                |      |                         |             |                  |             | Six1, Tfap2c, Satb2, Tbx3, Ptch1                               | Pax3, Gap43, Hes1           |              |                                | Prrx1, Pax3, Tbx2, Pax7, Id2, Wnt5a, Bcl11b, Eya1, Gas1            | Gap43, Ebf2, Nr1, Neurog1, Olig1, Six1, Myt1l                    |        |
| pattern specification process       |      |                         |             |                  |             | Foxf1, Six1, Satb2, Tbx3, Gpc3, Alx1, Ptch1, Pcsk5, Gja1, Zeb2 | Pax3, Irx3, Nbl1, Wls, Hes1 |              |                                | Wls, Alx1, Pax3, Irx3, Msx1, Tbx2, Pax7, Acvr2b, Wnt5a, Eya1, Gas1 |                                                                  |        |
| neural crest cell development       |      |                         |             |                  |             | Pax3, Sox11, Hes1                                              |                             |              |                                | Alx1, Pax3, Twist1, Sox11                                          |                                                                  |        |
| mesoderm development                |      |                         |             |                  |             | Foxf1, Inhba, Tead2, Tbx3, Gja1                                | Hes1                        |              |                                | Wls, Irx3, Acvr2b, Wnt5a, Eya1                                     |                                                                  |        |
| mesenchyme development              |      |                         |             |                  |             | Foxf1, Six1, Frzb, EphA3, Tead2, Alx1, Gja1, Trim28, Zeb2      | Pax3, Sox11, Hes1           |              |                                | Alx1, Pax3, Msx1, Twist1, Smad7, Sox11, Tbx2, Wnt5a                |                                                                  |        |
| mesenchymal cell differentiation    |      |                         |             |                  |             | Frzb, EphA3, Alx1, Gja1, Trim28, Zeb2                          | Pax3, Sox11, Hes1           |              |                                | Alx1, Pax3, Msx1, Twist1, Smad7, Sox11, Wnt5a                      |                                                                  |        |
| mesenchymal cell proliferation      |      | Prrx2, Msx1             |             |                  |             | Foxf1, Six1, Gpc3                                              |                             | Hmgbl1, Six1 |                                | Prrx1, Prrx2, Msx1, Wnt5a, Gas1                                    |                                                                  | Hmgbl1 |
| bone development                    |      |                         |             |                  |             | Dlx5, Osr2, Serpinh1, Mmp14, Gja1                              |                             |              | Sparc, Col2a1, Serpinh1, Anxa6 |                                                                    |                                                                  |        |
| osteoblast differentiation          |      |                         |             | Cbfb, Id2, Sfrp2 |             | Dlx1, Dlx5, Satb2, Ptch1, Gja1                                 |                             |              |                                | Id1, Id3, Twist1, Sox11, Erh, Acvr2b, Id2                          |                                                                  |        |
| osteoblast proliferation            |      |                         |             |                  |             | Osr2, Fbn5                                                     |                             |              |                                |                                                                    |                                                                  |        |
| cartilage development               |      | Prrx2, Msx1             |             |                  |             | Frzb, Osr2, Serpinh1, Satb2                                    |                             |              |                                | Prrx1, Prrx2, Msx1, Smad7, Pax7, Wnt5a                             |                                                                  |        |
| connective tissue development       |      |                         |             |                  |             | Six1, Fos, Ppp3ca, Tbx3, Plagl1, Gja1, Zfand5                  |                             |              |                                | Prrx1, Prrx2, Msx1, Smad7, Pax7, Id2, Wnt5a                        |                                                                  |        |
| muscle tissue development           |      |                         |             |                  |             | Frzb, Rspo3, Dlx5, Sox4, Gpc3                                  |                             |              |                                | Id2, Six1, Fos, Ddx5, Col11a1, Col3a1                              |                                                                  |        |
| canonical Wnt signaling pathway     |      |                         |             |                  |             |                                                                |                             |              |                                |                                                                    |                                                                  |        |
| non-canonical Wnt signaling pathway |      |                         |             |                  |             |                                                                |                             |              |                                |                                                                    |                                                                  |        |
| cellular aldehyde metabolic process |      |                         | Gpc3, Sfrp2 |                  | Aldoa, Tpi1 |                                                                |                             |              |                                |                                                                    |                                                                  |        |
| cytoplasmic translation             |      | Rpl8, Rps2, Rpl29, Rpsa | Rpl8, Rps2  |                  |             | Rpl8, Rps2, Rpsa                                               |                             |              |                                |                                                                    | Rpl8, Rps2, Rps23, Rpl18a, Rpl10a, Rpsa, Rpl19, Rpl18, Eif5, Pkm |        |

**Table S3. List of primers used for quantification of specific gene expression in this study.**

| <b>Genes</b>  | <b>Forward Primer</b>      | <b>Reverse Primer</b>         |
|---------------|----------------------------|-------------------------------|
| <i>Alx1</i>   | TTACCAAGGACGGACAGCTA       | CATGCATGACGTAACCACAG          |
| <i>Alx3</i>   | CGTACTGCCCGAAGACTGACA      | ATGCCCTCTGGAGACATGAG          |
| <i>Alx4</i>   | ACACATGGGCAGCCTGTTTG       | TGCTTGAGGTCTTGCGGTCT          |
| <i>Dlx5</i>   | CTGGTGACTGTGGCGAGTTA       | CAGAAGAGTCCCAAGCATCC          |
| <i>Dlx6</i>   | CTCAATACCTGGCCCTTCC        | AGAGCGCTTATTCTGAAACCAT        |
| <i>Gapdh</i>  | CAACGACCCCTTCATTGACC       | GGTCTCGCTCCTGGAAGATG          |
| <i>Id1</i>    | TTCTCAGGATCATGAAGGTCGCCA   | TTTGCTCCGACAGACCAAGTACCA      |
| <i>Id2</i>    | TGCCCAATGTAAGCAGACTTTGCC   | ACAGCATTCTAGTAGGCTCGTGTCA     |
| <i>Lef1</i>   | TCACTGTCAGGCGACACTTC       | TGAGGCTTCACGTGCATTAG          |
| <i>Msx1</i>   | AAGATGCTCTGGTGAAGGCCGAAA   | CTTGCGGTTGGTCTTGTGCTT         |
| <i>Msx2</i>   | ATACAGGAGCCCAGGAGATACT     | AACTTGCGCTCCAAGGCTAGAA        |
| <i>Pax3</i>   | TGCCCTCAGTGAGTTCTATCAGC    | GCTAAACCAGACCTGCACTCGGGC      |
| <i>Pax7</i>   | CCGTGTTTCCCATGGTTGTG       | GAGCACTCGGCTAATCGAAC          |
| <i>Pdgfra</i> | GAGGATAAGCTGAAGGACTGGGAAGG | TACTGGAACCTGTCTCGATGGCACT     |
| <i>Tfap2a</i> | CGCTCCTGGGCGGAGTA          | CCTATCTTGTCCAGTTTTTCTCTTAAAGA |
| <i>Tfap2b</i> | GGCTTCTTGGGAGGAATGTCAG     | CCTTCTACCAGTGAGGTGAGTAACG     |
| <i>Twist1</i> | AGTCTGAACACTCGTTTGTGTCCC   | ATGCCTTTCCTGTCTAGTGGCTGAT     |
| <i>Wls</i>    | TTTCCAAATCGTTGCCTTTCTG     | TGGTTCTTACGGACATCCAC          |
| <i>Wnt5a</i>  | AGGAGTTCGTGGACGCTAGA       | ACTTCTCCTTGAGGGCATCG          |
| <i>Wnt9b</i>  | AAGTACAGCACCAAGTTCCTC      | CACTTGCAGGTTGTTCTCAG          |

**Table S4.** List of primers used for CHIP PCR assays in this study.

| <b>Gene</b>       | <b>Forward primer (5'→3')</b> | <b>Reverse primer (5'→3')</b> | <b>Size (bp)</b> |
|-------------------|-------------------------------|-------------------------------|------------------|
| <i>Wnt5a_BS1</i>  | GGGAGTGAACCGATCTTTGA          | CTTCGGCTCTTTTCCTAAGC          | 152              |
| <i>Wnt5a_BS2</i>  | GCGGGGGTTAGTTTGTGAAC          | CCGAAGGAAAAGTTGTTTGG          | 159              |
| <i>Kif26b_BS1</i> | GTATTCTGCCCCCTCCTTTC          | CGGGGTGTCATTTTTTCATT          | 259              |
| <i>Kif26b_BS2</i> | CGGATTCTCTAGACCAAAAATAAA      | TCCCCAAATTAAGGTGTAAATTC       | 179              |
| <i>Kif26b_BS3</i> | CAGCCCAGGCTAAGTCAAAG          | GTTTGCATGGGTCTGTTTCC          | 154              |
| <i>Smad7_BS1</i>  | GTGCACAGAATTCGAGGAGA          | CTACAGTGGCTCCCGAGTGT          | 254              |
| <i>Smad7_BS2</i>  | CTGAATCCAGGGTCTCTAAGGA        | AGGACAGTCATGAACTTACGG         | 220              |
| <i>Smad7_BS3</i>  | CTTCCCGGGTTGCTTTAGA           | CCATTCCCCTTCCACACTAA          | 240              |
| <i>Smad7_BS4</i>  | CACCTACTTGCCCCATCTGT          | GCCACCACTGCTCTGCTAGT          | 256              |
| <i>Smad7_BS5</i>  | ACCATAAAGCACCAGCCATT          | CAGATGGGGCAAGTAGGTGT          | 243              |
| <i>Smad7_BS6</i>  | CTGCACCGTGATTAGGGTTT          | GGCTCTTCTTTGCGCTCAC           | 237              |
